# Supplementary material
Source: PubMed Central journal article supplement (PMC7423661)
Supplement: rspb20201031_review_history.pdf [file rspb20201031_review_history.pdf]

## Sperm velocity in a promiscuous bird across experimental media of different viscosities

Tim Schmoll, Geir Rudolfson, Holger Schielzeth and Oddmund Kleven

### Article citation details

*Proc. R. Soc. B* **287**: 20201031.

<http://dx.doi.org/10.1098/rspb.2020.1031>

### Review timeline

Original submission: 5 May 2020  
Revised submission: 19 June 2020  
Final acceptance: 22 June 2020

Note: Reports are unedited and appear as submitted by the referee. The review history appears in chronological order.

## Review History

### RSPB-2020-1031.R0 (Original submission)

#### Review form: Reviewer 1

##### Recommendation

Accept as is

**Scientific importance: Is the manuscript an original and important contribution to its field?**

Good

**General interest: Is the paper of sufficient general interest?**

Good

**Quality of the paper: Is the overall quality of the paper suitable?**

Good

**Is the length of the paper justified?**

Yes

**Should the paper be seen by a specialist statistical reviewer?**

Yes

**Do you have any concerns about statistical analyses in this paper? If so, please specify them explicitly in your report.**

No

**It is a condition of publication that authors make their supporting data, code and materials available - either as supplementary material or hosted in an external repository. Please rate, if applicable, the supporting data on the following criteria.**

**Is it accessible?**

Yes

**Is it clear?**

Yes

**Is it adequate?**

Yes

**Do you have any ethical concerns with this paper?**

No

### **Comments to the Author**

The authors have responded to my comments to their first version of the manuscript. They have explained more about the statistics, and they have added concern about the use of artificial ovarian fluid in bird studies.

Viscosity of the ovarian fluid might turn out to be an important part of ovarian fluid and sperm competition and not much has been published about this yet. Thus I believe this is an important contribution.

## **Review form: Reviewer 2**

### **Recommendation**

Accept with minor revision (please list in comments)

**Scientific importance: Is the manuscript an original and important contribution to its field?**

Good

**General interest: Is the paper of sufficient general interest?**

Acceptable

**Quality of the paper: Is the overall quality of the paper suitable?**

Good

**Is the length of the paper justified?**

Yes

**Should the paper be seen by a specialist statistical reviewer?**

No

**Do you have any concerns about statistical analyses in this paper? If so, please specify them explicitly in your report.**

No

**It is a condition of publication that authors make their supporting data, code and materials available - either as supplementary material or hosted in an external repository. Please rate, if applicable, the supporting data on the following criteria.**

**Is it accessible?**

No

**Is it clear?**

N/A

**Is it adequate?**

N/A

**Do you have any ethical concerns with this paper?**

No

**Comments to the Author**

The authors have greatly improved their manuscript and carefully addressed all main issues. I have no further reservations but just a few suggestions for minor edits (by line).

22 I suggest moving “however” to before or after “Few studies” for better English

25 “by” is missing before “up to about 50%” as otherwise it would imply an increase to 50%

32 Don’t you mean “slowed down by a similar degree”? “to a similar degree” would imply the same end point, not the same rate of decline.

79 I’m not sure that sperm have a “preferred time” and then wait to leave the SST until that time arrives. It seems to me that they simply leave more or less at random, but those sperm that happen to leave within a certain time-frame relative to ovulation simply have higher fertilization success. Maybe what you mean, then, is “to leave the tubules at the optimal time” or something along those lines?

95 Don’t you mean “in vitro”? I don’t see why artificial viscous medium would be necessary for in vivo assessment where sperm would be in the female reproductive tract (to whatever extent sperm behavior could be assessed there). Or do you mean highly viscous medium should be used to better simulate the conditions experienced in vivo? Please clarify.

126-127 You probably mean “a trait that itself can be the target of natural or sexual selection”

133 Delete “a” before “zero”

159-160 within 160 two minutes of sampling

199 Remove second hyphen in “low-viscosity-environment”

338 I leave this to the authors’ discretion, but I personally find it odd that they now suddenly add two further decimal points to their p-value compared to previous values, possibly just to show that the value is below 0.05 if you look far back enough ( $P=0.0497$ ). In my opinion, this seems to put too much emphasis on the arbitrary significance threshold of  $\alpha = 0.05$  and does not really change much about the strength or biological significance. Just for reflection without judgement: Would they also have put so much emphasis on the deviation from 0.05 if the p-value had been 0.0503? And would that result have changed the conclusions relative to the reported  $P=0.0497$ ?

465 A correlation is typically considered strong or weak, not large or small.

## Decision letter (RSPB-2020-1031.R0)

12-Jun-2020

Dear Dr Schmoll

I am pleased to inform you that your Review manuscript RSPB-2020-1031 entitled "Sperm velocity in a promiscuous bird across experimental media of different viscosities" has been accepted for publication in Proceedings B.

The referee(s) do not recommend any further changes. Therefore, please proof-read your manuscript carefully and upload your final files for publication. Because the schedule for publication is very tight, it is a condition of publication that you submit the revised version of your manuscript within 7 days. If you do not think you will be able to meet this date please let me know immediately.

To upload your manuscript, log into <http://mc.manuscriptcentral.com/prsb> and enter your Author Centre, where you will find your manuscript title listed under "Manuscripts with Decisions." Under "Actions," click on "Create a Revision." Your manuscript number has been appended to denote a revision.

You will be unable to make your revisions on the originally submitted version of the manuscript. Instead, upload a new version through your Author Centre.

Before uploading your revised files please make sure that you have:

1) A text file of the manuscript (doc, txt, rtf or tex), including the references, tables (including captions) and figure captions. Please remove any tracked changes from the text before submission. PDF files are not an accepted format for the "Main Document".

2) A separate electronic file of each figure (tiff, EPS or print-quality PDF preferred). The format should be produced directly from original creation package, or original software format. Please note that PowerPoint files are not accepted.

3) Electronic supplementary material: this should be contained in a separate file from the main text and the file name should contain the author's name and journal name, e.g. `authorname_procb_ESM_figures.pdf`

All supplementary materials accompanying an accepted article will be treated as in their final form. They will be published alongside the paper on the journal website and posted on the online figshare repository. Files on figshare will be made available approximately one week before the accompanying article so that the supplementary material can be attributed a unique DOI. Please see: <https://royalsociety.org/journals/authors/author-guidelines/>

4) Data-Sharing and data citation

It is a condition of publication that data supporting your paper are made available. Data should be made available either in the electronic supplementary material or through an appropriate repository. Details of how to access data should be included in your paper. Please see <https://royalsociety.org/journals/ethics-policies/data-sharing-mining/> for more details.

If you wish to submit your data to Dryad (<http://datadryad.org/>) and have not already done so you can submit your data via this link <http://datadryad.org/submit?journalID=RSPB&manu=RSPB-2020-1031> which will take you to your unique entry in the Dryad repository.

If you have already submitted your data to dryad you can make any necessary revisions to your dataset by following the above link.

5) For more information on our Licence to Publish, Open Access, Cover images and Media summaries, please visit <https://royalsociety.org/journals/authors/author-guidelines/>.

Once again, thank you for submitting your manuscript to Proceedings B and I look forward to receiving your final version. If you have any questions at all, please do not hesitate to get in touch.

Sincerely,

Professor Gary Carvalho  
mailto:proceedingsb@royalsociety.org

Associate Editor Board Member: 1

Comments to Author:

Both reviewers are satisfied with the changes that have been made, as am I. Reviewer 2 has some suggestions for minor edits.

Reviewer(s)' Comments to Author:

Referee: 1

Comments to the Author(s)

The authors have responded to my comments to their first version of the manuscript. They have explained more about the statistics, and they have added concern about the use of artificial ovarian fluid in bird studies.

Viscosity of the ovarian fluid might turn out to be an important part of ovarian fluid and sperm competition and not much has been published about this yet. Thus I believe this is an important contribution.

Referee: 2

Comments to the Author(s)

The authors have greatly improved their manuscript and carefully addressed all main issues. I have no further reservations but just a few suggestions for minor edits (by line).

22 I suggest moving "however" to before or after "Few studies" for better English

25 "by" is missing before "up to about 50%" as otherwise it would imply an increase to 50%

32 Don't you mean "slowed down by a similar degree"? "to a similar degree" would imply the same end point, not the same rate of decline.

79 I'm not sure that sperm have a "preferred time" and then wait to leave the SST until that time arrives. It seems to me that they simply leave more or less at random, but those sperm that happen to leave within a certain time-frame relative to ovulation simply have higher fertilization success. Maybe what you mean, then, is "to leave the tubules at the optimal time" or something along those lines?

95 Don't you mean "in vitro"? I don't see why artificial viscous medium would be necessary for in vivo assessment where sperm would be in the female reproductive tract (to whatever extent

sperm behavior could be assessed there). Or do you mean highly viscous medium should be used to better simulate the conditions experienced in vivo? Please clarify.

126-127 You probably mean “a trait that itself can be the target of natural or sexual selection”

133 Delete “a” before “zero”

159-160 within 160 two minutes of sampling

199 Remove second hyphen in “low-viscosity-environment”

338 I leave this to the authors’ discretion, but I personally find it odd that they now suddenly add two further decimal points to their p-value compared to previous values, possibly just to show that the value is below 0.05 if you look far back enough ( $P=0.0497$ ). In my opinion, this seems to put too much emphasis on the arbitrary significance threshold of  $\alpha = 0.05$  and does not really change much about the strength or biological significance. Just for reflection without judgement: Would they also have put so much emphasis on the deviation from 0.05 if the p-value had been 0.0503? And would that result have changed the conclusions relative to the reported  $P=0.0497$ ?

465 A correlation is typically considered strong or weak, not large or small.

Best wishes,  
The Proceedings B Team  
mailto:proceedingsb@royalsociety.org

## Decision letter (RSPB-2020-1031.R1)

22-Jun-2020

Dear Dr Schmoll

I am pleased to inform you that your manuscript entitled "Sperm velocity in a promiscuous bird across experimental media of different viscosities" has been accepted for publication in Proceedings B.

You can expect to receive a proof of your article from our Production office in due course, please check your spam filter if you do not receive it. PLEASE NOTE: you will be given the exact page length of your paper which may be different from the estimation from Editorial and you may be asked to reduce your paper if it goes over the 10 page limit.

If you are likely to be away from e-mail contact please let us know. Due to rapid publication and an extremely tight schedule, if comments are not received, we may publish the paper as it stands.

If you have any queries regarding the production of your final article or the publication date please contact [procb\\_proofs@royalsociety.org](mailto:procb_proofs@royalsociety.org)

Your article has been estimated as being 10 pages long. Our Production Office will be able to confirm the exact length at proof stage.

### Open Access

You are invited to opt for Open Access, making your freely available to all as soon as it is ready for publication under a CCBY licence. Our article processing charge for Open Access is £1700.

Corresponding authors from member institutions (<http://royalsocietypublishing.org/site/librarians/allmembers.xhtml>) receive a 25% discount to these charges. For more information please visit <http://royalsocietypublishing.org/open-access>.

#### Paper charges

An e-mail request for payment of any related charges will be sent out shortly. The preferred payment method is by credit card; however, other payment options are available.

#### Electronic supplementary material:

All supplementary materials accompanying an accepted article will be treated as in their final form. They will be published alongside the paper on the journal website and posted on the online figshare repository. Files on figshare will be made available approximately one week before the accompanying article so that the supplementary material can be attributed a unique DOI.

You are allowed to post any version of your manuscript on a personal website, repository or preprint server. However, the work remains under media embargo and you should not discuss it with the press until the date of publication. Please visit <https://royalsociety.org/journals/ethics-policies/media-embargo> for more information.

Thank you for your fine contribution. On behalf of the Editors of the Proceedings B, we look forward to your continued contributions to the Journal.

Sincerely,

Proceedings B  
mailto: [proceedingsb@royalsociety.org](mailto:proceedingsb@royalsociety.org)
